# Supplementary material for: Ovarian carcinoma CDK12 mutations misregulate expression of DNA repair genes via deficient formation and function of the Cdk12/CycK complex
Source: PubMed Central journal article supplement — Nucleic Acids Res. 2015 Feb 20;43(5):2575–89. doi: 10.1093/nar/gkv101 (PMC4357706; doi:10.1093/nar/gkv101), 2015-02-20
Supplement: supp_gkv101_nar-01912-d-2014-File008.pdf [file supp_gkv101_nar-01912-d-2014-File008.pdf]

## **Inventory of Supplementary Material**

### **Ovarian carcinoma *CDK12* mutations misregulate expression of DNA repair genes via deficient formation and function of the Cdk12/CycK complex**

Kingsley M. Ekumi, Hana Paculova, Tina Lenasi, Vendula Pospichalova, Christian A. Böskén, Jana Rybarikova, Vitezslav Bryja, Matthias Geyer, Dalibor Blazek and Matjaz Barboric

#### **Supplementary Figures and Figure Legends, pages 2-11**

Supplementary Figure S1, related to Figures 1 and 2

Supplementary Figure S2, related to Figure 1

Supplementary Figure S3, related to Figure 1

Supplementary Figure S4, related to Figure 3

Supplementary Figure S5, related to Figure 4

Supplementary Figure S6, related to Figure 4

Supplementary Figure S7, related to Figure 4

Supplementary Figure S8, related to Figure 4

Supplementary Figure S9, related to Figure 5

#### **Supplementary Tables S1-S6, pages 12-20**

#### **Supplementary References, page 21**



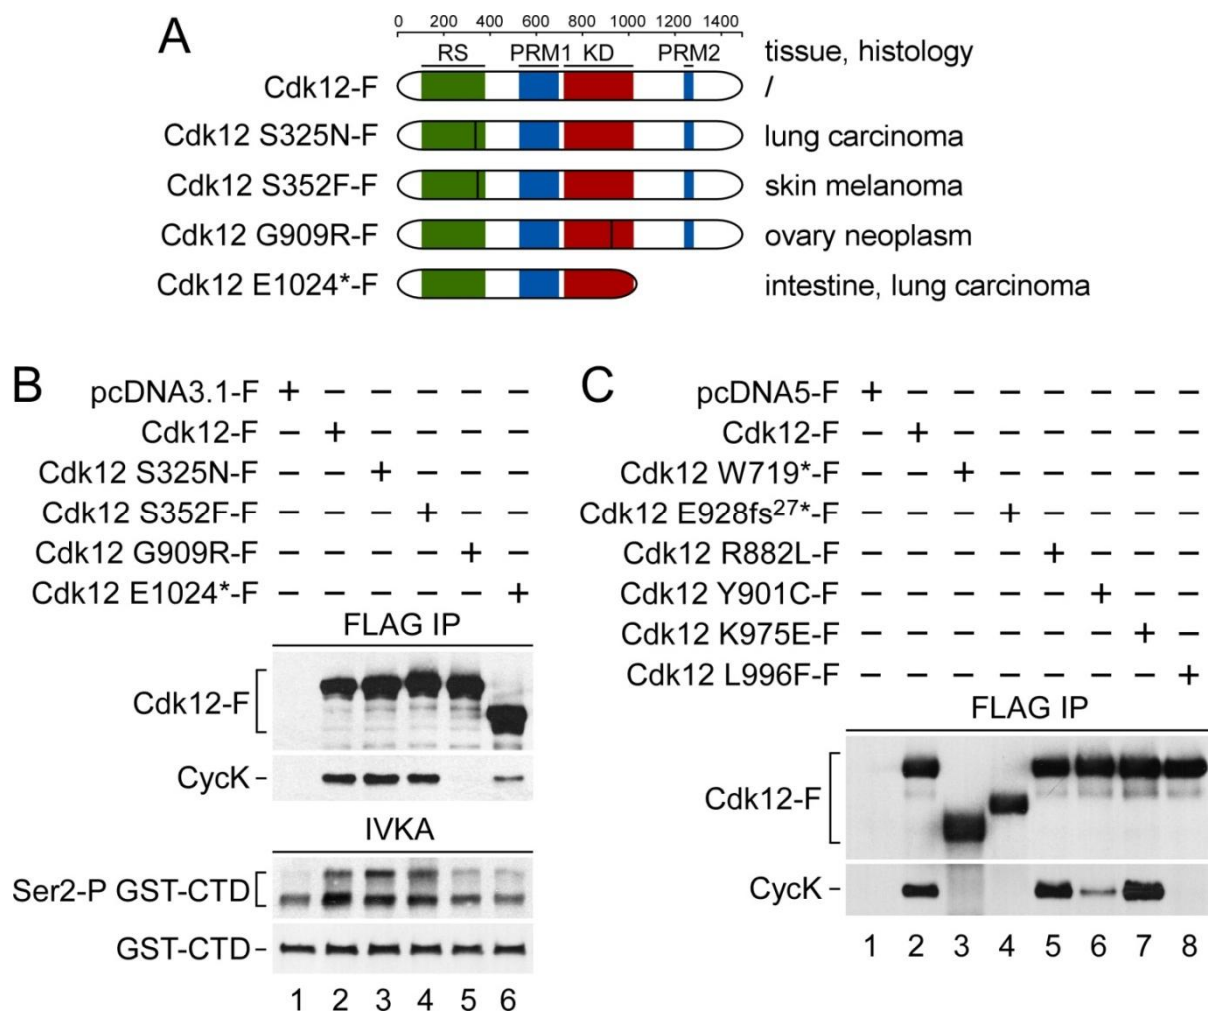

**Supplementary Figure S2.** *CDK12* mutations from other cancers that impact the KD of Cdk12 have detrimental effects on the formation and activity of the Cdk12/CycK complex. (A) Schematic depiction of wild-type and mutant Cdk12 proteins containing individual *CDK12* mutations. Highly structured kinase domain (KD; red), arginine/serine rich region (RS; green) and two regions with proline-rich motifs (PRM1 and PRM2; blue) are depicted. The ruler on top indicates the length of Cdk12 protein in amino acids. Vertical lines denote sites of individual missense mutations. Cancer tissue/histology with a particular *CDK12* mutation is listed on the right. (B) Effects of the *CDK12* mutations on the interaction between Cdk12 and CycK. The indicated wild-type and mutant Cdk12-F proteins were expressed transiently in HEK 293 cells, immuno-purified from WCEs using FLAG-M2 agarose (FLAG IP) and examined for their interaction with endogenous CycK. The complexes were examined for their interaction with endogenous CycK (top) and for their kinase activity by *in vitro* kinase assay (IVKA) towards recombinant GST-CTD as a substrate (bottom). Levels of Cdk12-F, CycK, Ser2-P GST-CTD isoforms, and input GST-CTD (30%) were detected by Western blotting. (C) Amounts of the purified Cdk12-F complexes used for *in vitro* kinase assays. The indicated wild-type and mutant FLAG epitope-tagged Cdk12 proteins (Cdk12-F) were immuno-purified from whole cell extracts WCEs of the individual HEK 293 Flp-In T-Rex cell lines using FLAG-M2 agarose (FLAG IP) and used for the *in vitro* kinase assays as in Figure 1D. Levels of Cdk12-F and CycK proteins in the IPs were detected by Western blotting using FLAG and CycK antibodies.

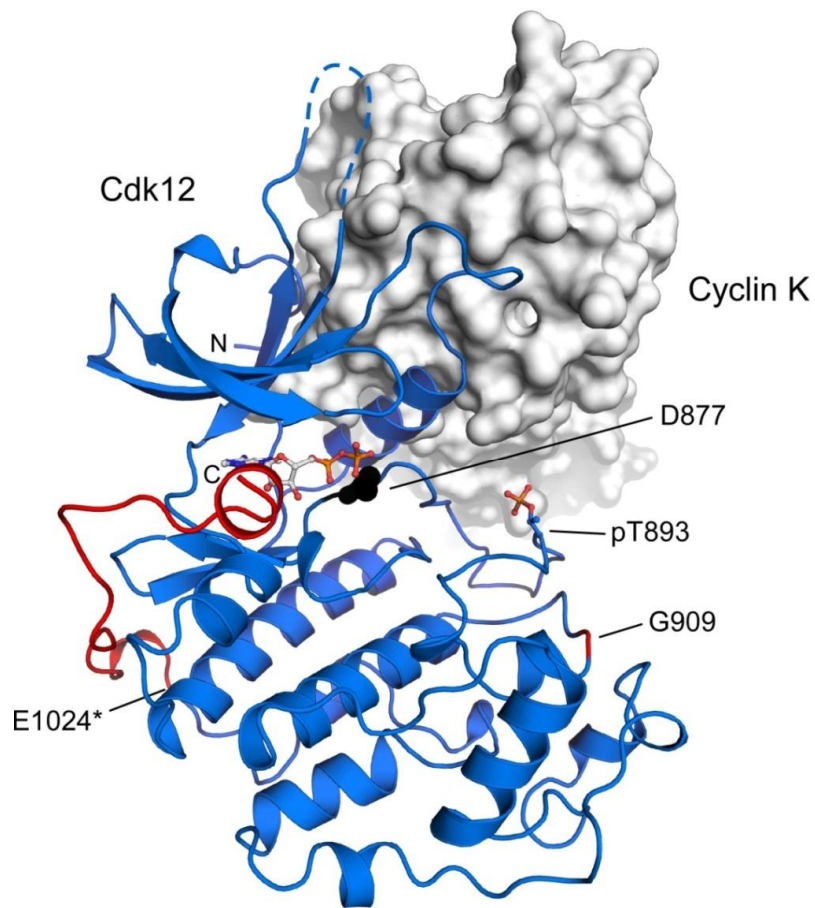

**Supplementary Figure S3.** Location of the G909R and E1024\* *CDK12* KD mutations. Overall structure of Cdk12/CycK is presented. Cdk12 is shown as cartoon representation in blue and CycK as surface representation in grey. The *CDK12* missense G909R mutation and the truncated C-terminal extension of the canonical KD that is absent in the *CDK12* nonsense E1024\* mutation are depicted in red. pT893 is highlighted in orange and D877 is shown in black.



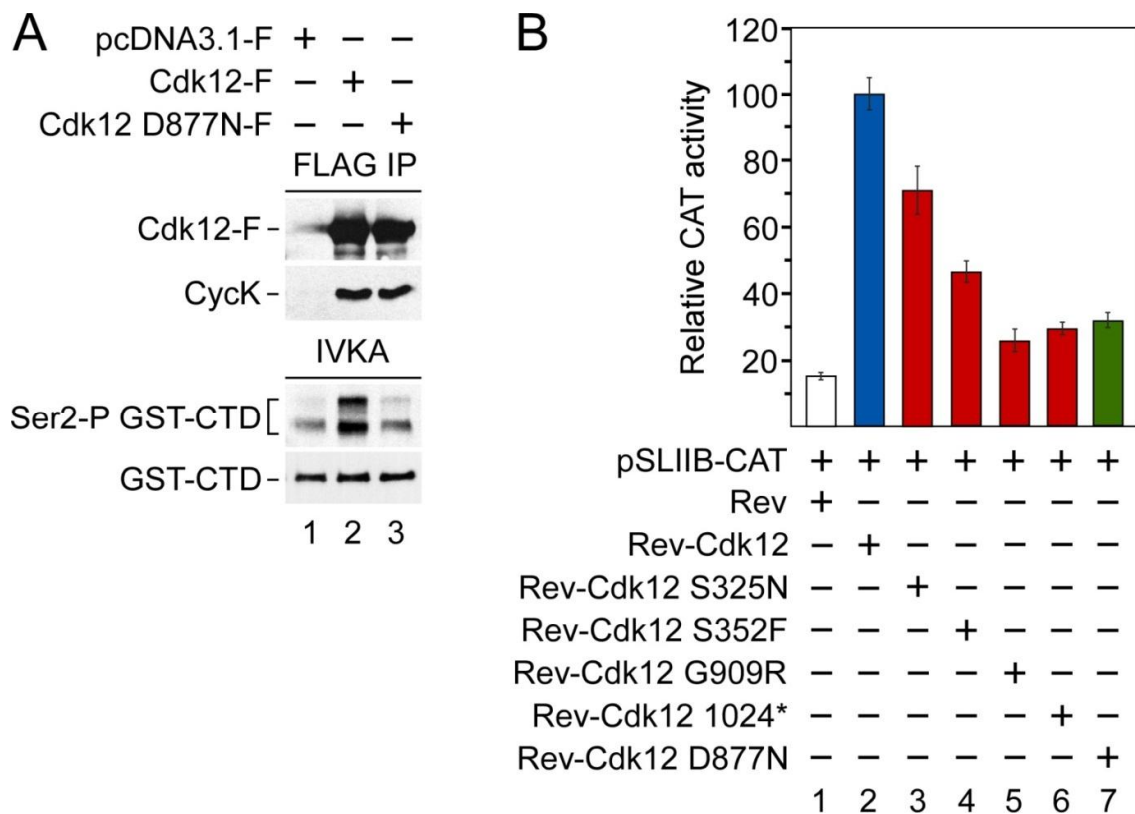

**Supplementary Figure S4.** Generation of the kinase-dead form of Cdk12 and impact of a set of *CDK12* mutations from other cancers on transcriptional activation by Cdk12. **(A)** Substitution of aspartic acid residue at position 877 of the activation segment DGF motif with asparagine residue produces a kinase-dead form of Cdk12, which still binds CycK. The indicated wild-type and mutant Cdk12-F proteins were expressed transiently in HEK 293 cells and immuno-purified from WCEs using FLAG-M2 agarose (FLAG IP). The complexes were examined for their interaction with endogenous CycK (top) and for their kinase activity by *in vitro* kinase assay (IVKA) towards recombinant GST-CTD as a substrate (bottom). Levels of Cdk12-F, CycK, Ser2-P GST-CTD isoforms, and input GST-CTD (30%) were detected by Western blotting. **(B)** A set of *CDK12* mutations from different cancers decrease transcriptional activation by Cdk12. HEK 293T cells were co-transfected with pSLIIB-CAT reporter gene and plasmids encoding the proteins indicated below the graph. Transcriptional activities of Rev (white bar), the mutant Rev-Cdk12 chimeras (red bars) and catalytically dead Rev-Cdk12 D887N control chimera (green bar) are represented as CAT activities relative to the activity of wild-type Rev-Cdk12 chimera (blue bar), which was set to 100%. Error bars represent the mean  $\pm$  SD.

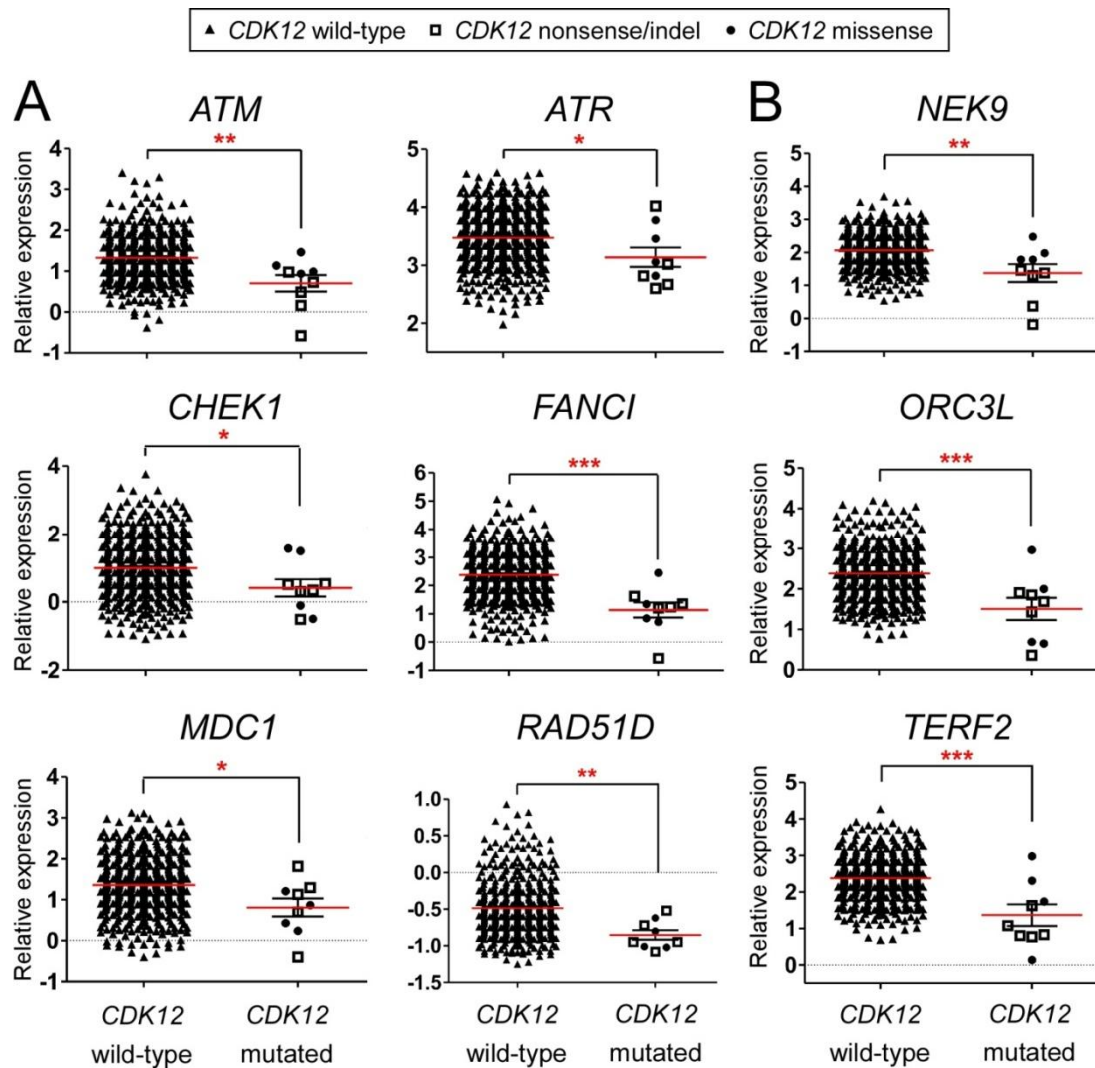

**Supplementary Figure S5.** Alternative representation of the down-regulation of the crucial DDR genes in HGS-OvCa patient samples with mutations in *CDK12*. (**A** and **B**) Graphs show comparisons of relative expression levels between the HGS-OvCa samples with the wild-type or mutated *CDK12*. The identity of genes is indicated on top of each graph. The data were generated using the same probes as in Figure 4. Whereas samples with the wild-type *CDK12* are plotted as black triangles, those containing the nonsense and internal deletion (indel) or missense *CDK12* mutations are depicted as open squares or black circles, respectively, as indicated by the legend above the graphs. Results are expressed as mean (red line) with standard error of the mean (SEM) (black whiskers). The number of asterisks (\*) indicates the degree of significance as follows: \* =  $P \leq 0.05$ ; \*\* =  $P \leq 0.01$ ; \*\*\* =  $P \leq 0.001$ . P values are not shown and are the same as in Figure 4. Panel **A** shows genes related to the HR pathway, while other affected DDR genes are shown in panel **B**.

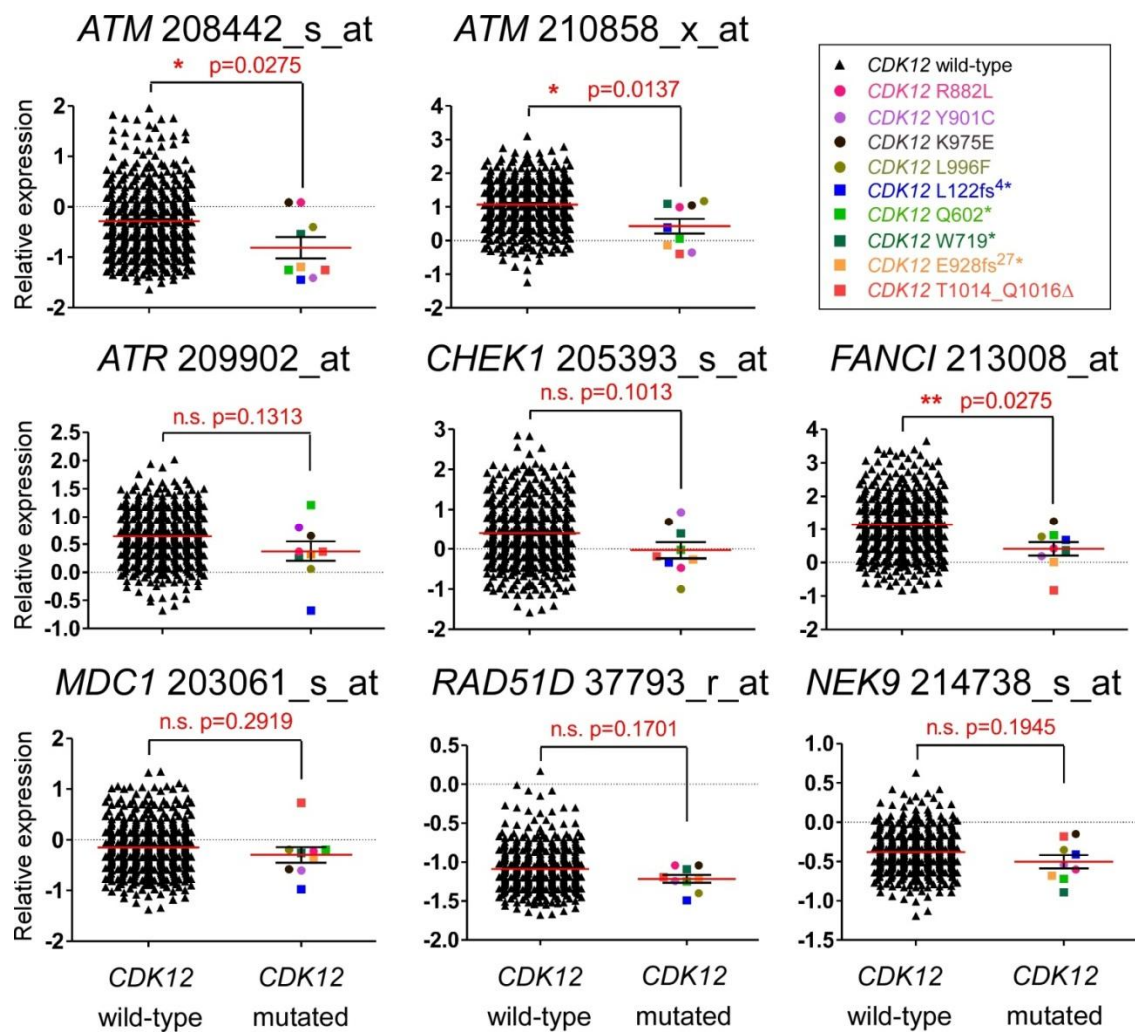

**Supplementary Figure S6.** The crucial DDR genes are down-regulated in HGS-OvCa patient samples with mutations in *CDK12* as determined by other microarray probes. Graphs show comparisons of relative expression levels between the HGS-OvCa samples with the wild-type or mutated *CDK12*. The identity of genes together with the microarray probe is indicated on top of each graph. Whereas samples with the wild-type *CDK12* are plotted as black triangles, those containing individual missense or nonsense/indel *CDK12* mutations are depicted as colored circles or squares, respectively, as indicated by the legend in the top right corner. Results are expressed as mean (red line) with standard error of the mean (SEM) (black whiskers). P values are given next to red asterisks (\*) and the number of asterisks indicates the degree of significance as follows: \* =  $P \leq 0.05$ ; \*\* =  $P \leq 0.01$ ; \*\*\* =  $P \leq 0.001$ . 'n.s.' stands for non-significant; P value ( $P > 0.05$ ).

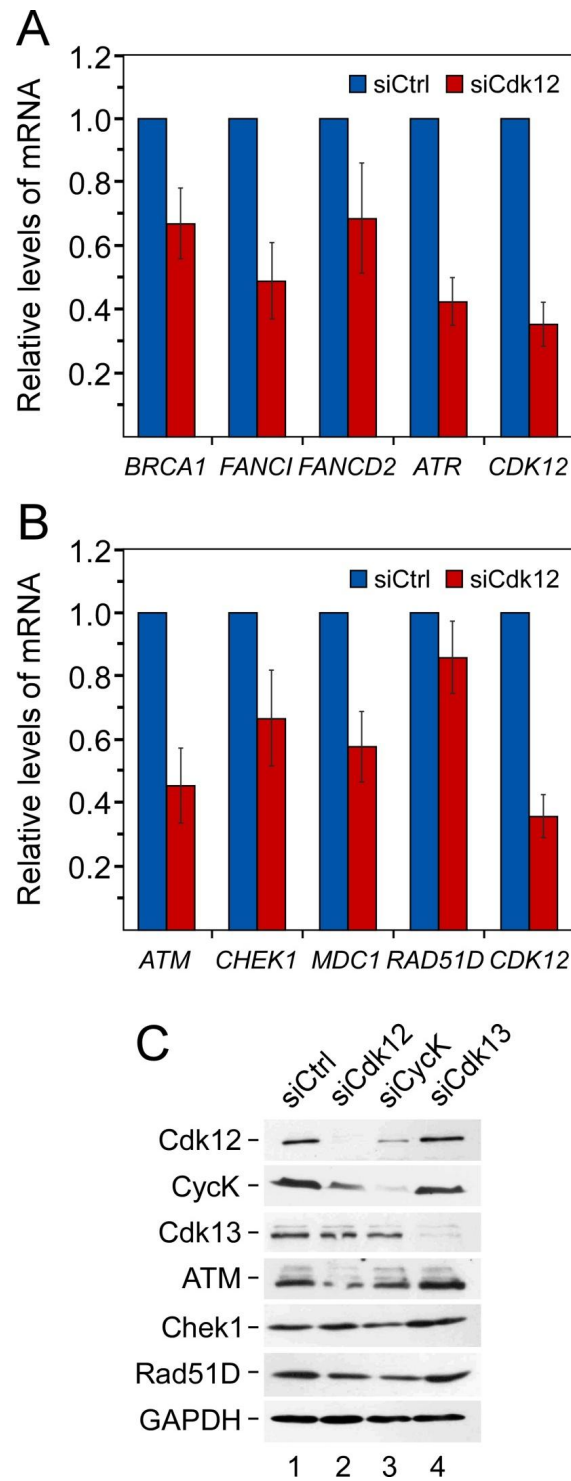

**Supplementary Figure S7.** Depletion of Cdk12 decreases the mRNA and protein levels of critical HR genes in HCT116 cells. (**A** and **B**) Relative mRNA levels of genes indicated below the bars were determined by RT-qPCR using total RNA samples isolated from HCT116 cells treated with the control (blue bars) or Cdk12 #1 siRNA (red bars). The error bars represent the mean  $\pm$  SD. (**C**) Levels of proteins indicated on left were determined by Western blotting using WCEs of HCT116 cells treated with the control, Cdk12 #1, CycK or Cdk13 siRNA.



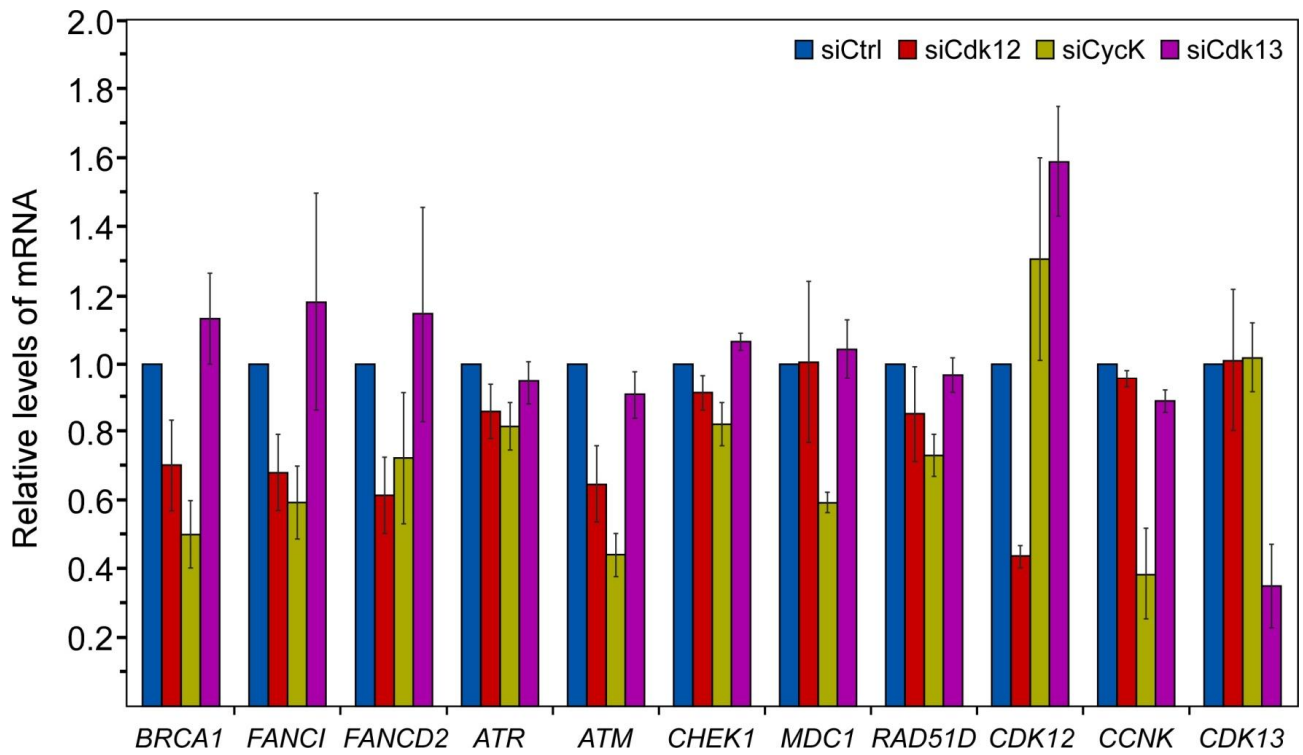

**Supplementary Figure S8.** Depletion of CycK and Cdk12 decreases the mRNA levels of critical HR genes in Caov-3 cells. Relative mRNA levels of genes indicated below the bars were determined by RT-qPCR using total RNA samples isolated from Caov-3 cells treated with the control (blue bars), Cdk12 #2 (red bars), CycK (olive green bars) or Cdk13 siRNA (purple bars). The error bars represent the mean  $\pm$  SD.

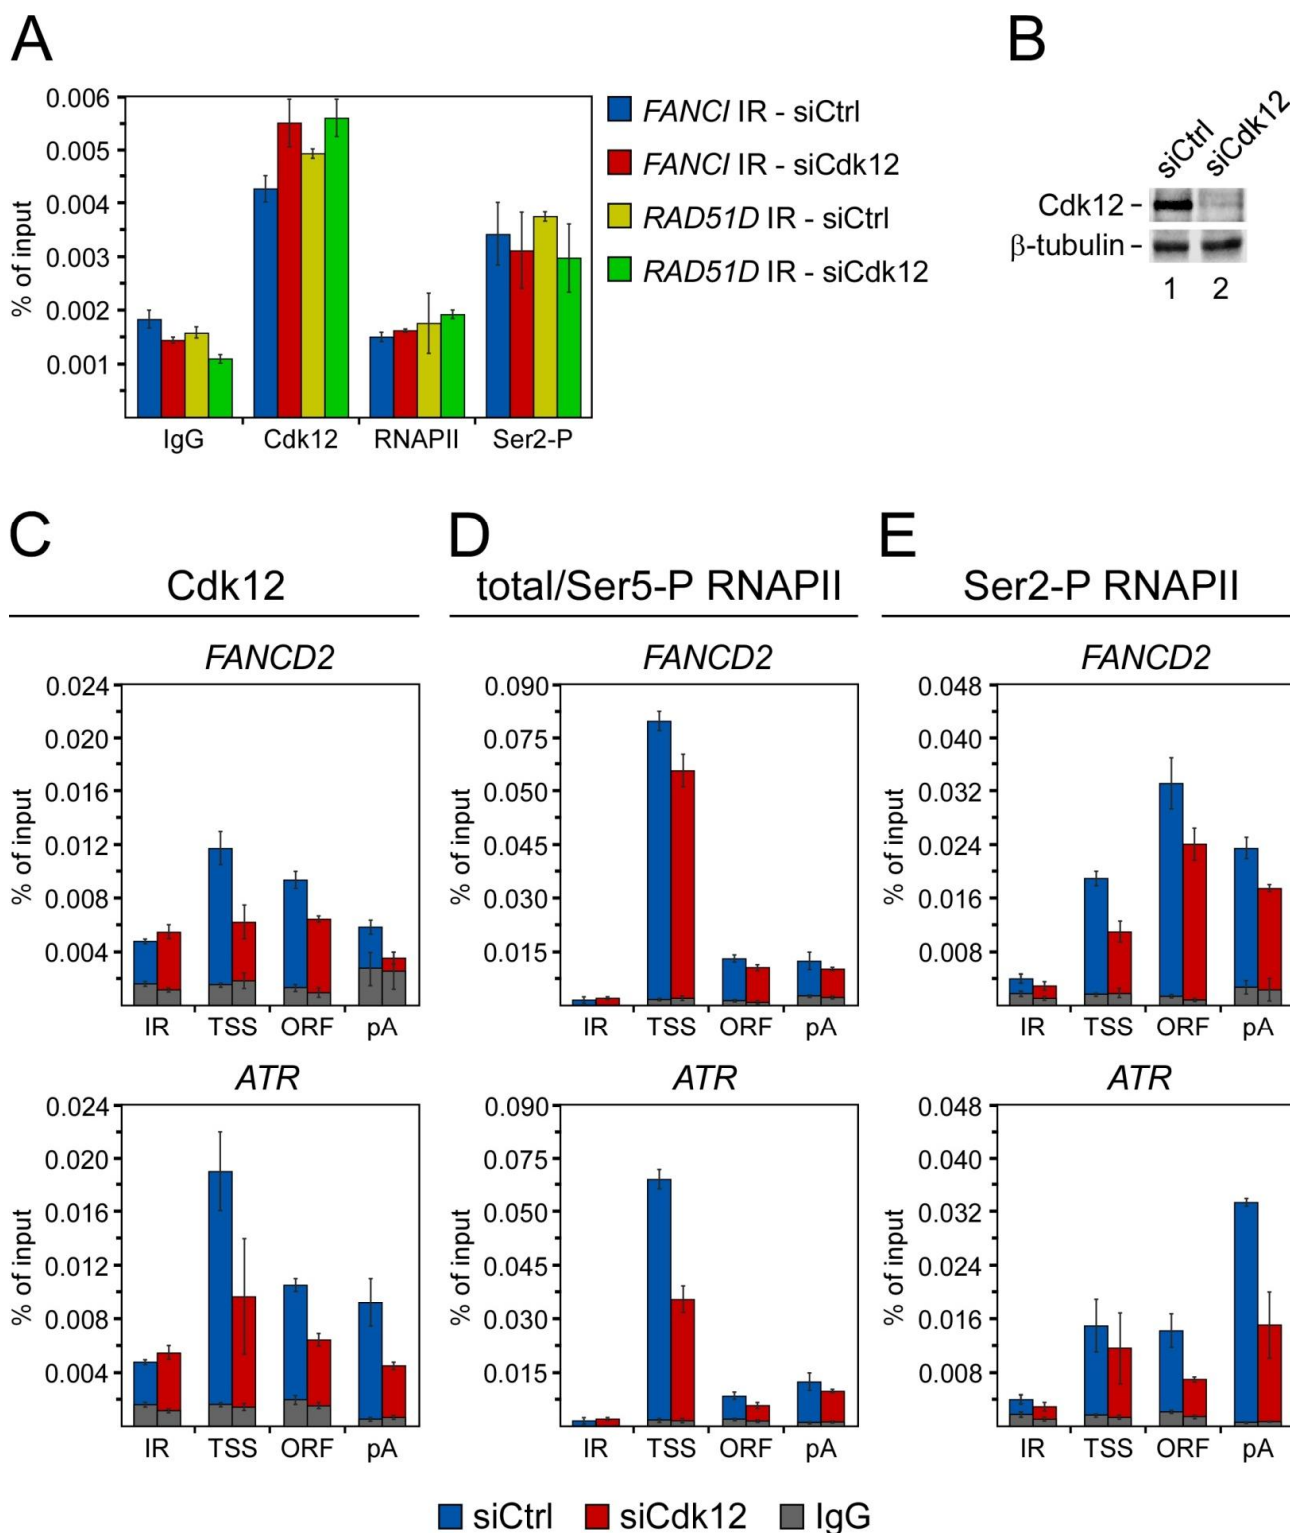

**Supplementary Figure S9.** (A) Two independent intergenic regions display comparable levels of IgG and specific proteins. Levels of IgG, Cdk12, total/Ser5-P RNAPII, and Ser2-P RNAPII occupancy at *FANCI* (blue and red bars) and *RAD51D* (yellow and green bars) intergenic regions were determined by ChIP-qPCR analysis in control or Cdk12 knockdown HeLa DR-GFP cells. Results are presented as percent of input DNA and plotted as the mean  $\pm$  SD. (B) Efficient depletion of Cdk12 in ChIP-qPCR experiments. Levels of proteins indicated on left were determined by Western blotting using WCEs of HeLa DR-GFP cells treated with the control or Cdk12 #2 siRNA. (C, D, E) Cdk12/CycK is present at the established HR genes to promote phosphorylation of the CTD of RNAPII at

Ser2. Control (blue bars) or Cdk12 knockdown HeLa DR-GFP cells (red bars) were subjected to ChIP-qPCR analysis to determine the levels of Cdk12 (panel **C**), total/Ser5-P RNAPII (panel **D**) and Ser2-P RNAPII (panel **E**) occupancy at *RAD51D* intergenic region (IR) and three gene-specific regions as indicated below the graphs. The identity of genes analyzed is indicated on top of each graph. Levels of IgG signals at IR and gene regions are presented as gray bars. Results are presented as percent of input DNA and plotted as the mean  $\pm$  SD.

## SUPPLEMENTARY TABLES

**Supplementary Table S1.** *CDK12* mutations in HGS-OvCa.

| Mutation (aa)         | Mutation (nt)         | Mutation ID | Mutation Type          | Validation |
|-----------------------|-----------------------|-------------|------------------------|------------|
| L122fs <sup>4*</sup>  | 363_364delCT          | COSM69050   | Deletion - Frameshift  | yes        |
| S363*                 | 1088C>G               | COSM1324005 | Nonsense               | no         |
| Q602*                 | 1804C>T               | COSM78919   | Nonsense               | yes        |
| P653L                 | 1958C>T               | COSM1324004 | Missense               | no         |
| W719*                 | 2156G>A               | COSM118018  | Nonsense               | yes        |
| S785fs <sup>4*</sup>  | 2351_2352insA         | COSM1324003 | Insertion - Frameshift | no         |
| R882L                 | 2645G>T               | COSM70301   | Missense               | yes        |
| Y901C                 | 2702A>G               | COSM74101   | Missense               | yes        |
| E928fs <sup>27*</sup> | 2778_2779insG         | COSM69187   | Insertion - Frameshift | yes        |
| K975E                 | 2923A>G               | COSM70302   | Missense               | yes        |
| R983_E984>Q           | 2948_2950delGAG       | COSM1324002 | Deletion - In frame    | no         |
| L996F                 | 2988A>T               | COSM70303   | Missense               | yes        |
| T1014_Q1016del        | 3036_3044delACAGACCCT | COSM69117   | Deletion - In frame    | yes        |
| A1174G                | 3521C>G               | COSM94100   | Missense               | yes        |
| /                     | 1028_1046+14del 33    | COSM1324006 | Intronic deletion      | no         |

Information on *CDK12* mutations was obtained from the COSMIC database on April 20, 2014. Validated *CDK12* mutations identified in the HGS-OvCa TCGA study are marked in green.



**Supplementary Table S2. CDK12 mutations in human cancers.**

| Position | Mutation         | Region | Count | Primary Tissue  | Mutation Type                |
|----------|------------------|--------|-------|-----------------|------------------------------|
| 46       | K46fs*1          | /      | 1     | Lung            | Insertion - Frameshift       |
| 55       | L55L             | /      | 1     | Endometrium     | Substitution - coding silent |
| 55       | L55F             | /      | 1     | Cervix          | Substitution - Missense      |
| 86       | D86N             | /      | 1     | Breast          | Substitution - Missense      |
| 104      | R104R            | RS     | 1     | Breast          | Substitution - coding silent |
| 122      | L122fs*4         | RS     | 1     | Ovary           | Deletion - Frameshift        |
| 148      | S148L            | RS     | 1     | Urinary tract   | Substitution - Missense      |
| 172      | K172*            | RS     | 1     | NS              | Substitution - Nonsense      |
| 189      | E189K            | RS     | 1     | Urinary tract   | Substitution - Missense      |
| 192      | S192Y            | RS     | 1     | Large intestine | Substitution - Missense      |
| 208      | K208T            | RS     | 1     | Endometrium     | Substitution - Missense      |
| 213      | V213M            | RS     | 1     | Endometrium     | Substitution - Missense      |
| 238      | S238L            | RS     | 1     | Lung            | Substitution - Missense      |
| 265      | S265R            | RS     | 1     | Lung            | Substitution - Missense      |
| 266      | P266fs*72        | RS     | 1     | Prostate        | Deletion - Frameshift        |
| 276      | S276T            | RS     | 1     | Prostate        | Substitution - Missense      |
| 283      | S283L            | RS     | 1     | Lung            | Substitution - Missense      |
| 316      | S316N            | RS     | 1     | Large intestine | Substitution - Missense      |
| 323      | S323L            | RS     | 1     | Lung            | Substitution - Missense      |
| 325      | S325N            | RS     | 1     | Lung            | Substitution - Missense      |
| 327      | Y327C            | RS     | 1     | Lung            | Substitution - Missense      |
| 334      | S334C            | RS     | 1     | Liver           | Substitution - Missense      |
| 352      | S352F            | RS     | 1     | Skin            | Substitution - Missense      |
| 363      | S363*            | RS     | 1     | Ovary           | Substitution - Nonsense      |
| 406      | R406fs*29        | /      | 1     | Prostate        | Deletion - Frameshift        |
| 421      | K421N            | /      | 1     | Large intestine | Substitution - Missense      |
| 425      | V425A            | /      | 1     | Lung            | Substitution - Missense      |
| 434      | S434S            | /      | 1     | Breast          | Substitution - coding silent |
| 438      | K438R            | /      | 1     | Lung            | Substitution - Missense      |
| 446      | K446K            | /      | 1     | Lung            | Substitution - coding silent |
| 449      | R449T            | /      | 1     | Lung            | Substitution - Missense      |
| 466      | T466A            | /      | 1     | Oesophagus      | Substitution - Missense      |
| 471      | E471Q            | /      | 1     | Lung            | Substitution - Missense      |
| 475      | S475Y            | /      | 1     | Endometrium     | Substitution - Missense      |
| 485      | E485E            | /      | 1     | Lung            | Substitution - coding silent |
| 487      | S487S            | /      | 1     | Endometrium     | Substitution - coding silent |
| 488      | E488*            | /      | 1     | Breast          | Substitution - Nonsense      |
| 489      | K489E            | /      | 1     | Lung            | Substitution - Missense      |
| 502      | D502Y            | /      | 1     | Large intestine | Substitution - Missense      |
| 535      | P535S            | PRM1   | 1     | Endometrium     | Substitution - Missense      |
| 536      | P536fs*74        | PRM1   | 1     | Large intestine | Deletion - Frameshift        |
| 536      | P536P            | PRM1   | 1     | Endometrium     | Substitution - coding silent |
| 538      | P538fs*72        | PRM1   | 1     | Large intestine | Deletion - Frameshift        |
| 544      | P544fs*31        | PRM1   | 1     | NS              | Insertion - Frameshift       |
| 545      | P545fs*65        | PRM1   | 1     | NS              | Deletion - Frameshift        |
| 554      | L554_P556del LPP | PRM1   | 1     | Endometrium     | Deletion - In frame          |
| 566      | L566L            | PRM1   | 1     | Urinary tract   | Substitution - coding silent |
| 569      | S569C            | PRM1   | 1     | Breast          | Substitution - Missense      |
| 578      | A578V            | PRM1   | 1     | Lung            | Substitution - Missense      |
| 583      | T583P            | PRM1   | 1     | Oesophagus      | Substitution - Missense      |
| 602      | Q602*            | PRM1   | 1     | Ovary           | Substitution - Nonsense      |
| 602      | Q602R            | PRM1   | 1     | Large intestine | Substitution - Missense      |
| 631      | P631P            | PRM1   | 1     | Lung            | Substitution - coding silent |
| 649      | L649R            | PRM1   | 1     | Kidney          | Substitution - Missense      |
| 653      | P653H            | PRM1   | 1     | Endometrium     | Substitution - Missense      |
| 653      | P653L            | PRM1   | 1     | Ovary           | Substitution - Missense      |

|      |             |           |   |                                 |                              |
|------|-------------|-----------|---|---------------------------------|------------------------------|
| 663  | R663C       | PRM1      | 1 | Large intestine                 | Substitution - Missense      |
| 677  | G677Y       | PRM1      | 1 | Lung                            | Substitution - Missense      |
| 677  | G677D       | PRM1      | 1 | Endometrium                     | Substitution - Missense      |
| 683  | P683fs*70   | PRM1      | 1 | Large intestine                 | Deletion - Frameshift        |
| 683  | P683T       | PRM1      | 1 | Endometrium                     | Substitution - Missense      |
| 691  | I691V       | PRM1      | 1 | Pancreas                        | Substitution - Missense      |
| 708  | R708C       | /         | 1 | Large intestine                 | Substitution - Missense      |
| 718  | D718N       | KD N-lobe | 1 | Large intestine                 | Substitution - Missense      |
| 719  | W719*       | KD N-lobe | 1 | Ovary                           | Substitution - Nonsense      |
| 722  | R722C       | KD N-lobe | 1 | Large intestine                 | Substitution - Missense      |
| 723  | C723Y       | KD N-lobe | 1 | Large intestine                 | Substitution - Missense      |
| 732  | I732fs*21   | KD N-lobe | 1 | Kidney                          | Deletion - Frameshift        |
| 740  | Q740E       | KD N-lobe | 1 | Lung                            | Substitution - Missense      |
| 758  | V758V       | KD N-lobe | 1 | Lung                            | Substitution - coding silent |
| 765  | E765G       | KD N-lobe | 1 | Urinary tract                   | Substitution - Missense      |
| 779  | R779C       | KD N-lobe | 1 | Large intestine                 | Substitution - Missense      |
| 785  | S785fs*4    | KD N-lobe | 1 | Ovary                           | Insertion - Frameshift       |
| 802  | F802V       | KD N-lobe | 1 | Large intestine                 | Substitution - Missense      |
| 813  | F813V       | KD N-lobe | 1 | Lung                            | Substitution - Missense      |
| 824  | L824P       | KD C-lobe | 1 | Stomach                         | Substitution - Missense      |
| 845  | E845D       | KD C-lobe | 1 | Lung                            | Substitution - Missense      |
| 850  | C850C       | KD C-lobe | 1 | Kidney                          | Substitution - coding silent |
| 852  | K852E       | KD C-lobe | 1 | Lung                            | Substitution - Missense      |
| 853  | K853N       | KD C-lobe | 1 | Endometrium                     | Substitution - Missense      |
| 870  | S870C       | KD C-lobe | 1 | Lung                            | Substitution - Missense      |
| 872  | Q872*       | KD C-lobe | 1 | Large intestine                 | Substitution - Nonsense      |
| 882  | R882R       | KD C-lobe | 1 | Large intestine                 | Substitution - coding silent |
| 882  | R882Q       | KD C-lobe | 1 | Large intestine                 | Substitution - Missense      |
| 882  | R882L       | KD C-lobe | 1 | Ovary                           | Substitution - Missense      |
| 887  | E887K       | KD C-lobe | 1 | Oesophagus                      | Substitution - Missense      |
| 890  | R890H       | KD C-lobe | 2 | Endometrium/<br>Large intestine | Substitution - Missense      |
| 890  | R890R       | KD C-lobe | 1 | Large intestine                 | Substitution - coding silent |
| 901  | Y901C       | KD C-lobe | 3 | Large intestine/<br>Ovary       | Substitution - Missense      |
| 901  | Y901*       | KD C-lobe | 1 | Breast                          | Substitution - Nonsense      |
| 901  | Y901Y       | KD C-lobe | 1 | large intestine                 | Substitution - coding silent |
| 902  | R902P       | KD C-lobe | 1 | Breast                          | Substitution - Missense      |
| 909  | G909R       | KD C-lobe | 1 | Ovary                           | Substitution - Missense      |
| 912  | R912C       | KD C-lobe | 2 | Large intestine                 | Substitution - Missense      |
| 912  | R912H       | KD C-lobe | 1 | Large intestine                 | Substitution - Missense      |
| 914  | T914T       | KD C-lobe | 1 | Breast                          | Substitution - coding silent |
| 928  | E928fs*27   | KD C-lobe | 1 | Ovary                           | Insertion - Frameshift       |
| 932  | K932N       | KD C-lobe | 1 | Large intestine                 | Substitution - Missense      |
| 937  | Q937fs*9    | KD C-lobe | 1 | Large intestine                 | Deletion - Frameshift        |
| 939  | N939S       | KD C-lobe | 1 | Breast                          | Substitution - Missense      |
| 947  | L947L       | KD C-lobe | 1 | Lung                            | Substitution - coding silent |
| 952  | C952fs*21   | KD C-lobe | 1 | Prostate                        | Deletion - Frameshift        |
| 959  | V959G       | KD C-lobe | 1 | Skin                            | Substitution - Missense      |
| 964  | I964M       | KD C-lobe | 1 | Breast                          | Substitution - Missense      |
| 974  | P974L       | KD C-lobe | 1 | Large intestine                 | Substitution - Missense      |
| 975  | K975E       | KD C-lobe | 1 | Ovary                           | Substitution - Missense      |
| 975  | K975R       | KD C-lobe | 1 | Large intestine                 | Substitution - Missense      |
| 981  | R981C       | KD C-lobe | 1 | Lung                            | Substitution - Missense      |
| 983  | R983_E984>Q | KD C-lobe | 1 | Ovary                           | Complex - deletion inframe   |
| 986  | F986L       | KD C-lobe | 1 | Endometrium                     | Substitution - Missense      |
| 987  | S987C       | KD C-lobe | 1 | Lung                            | Substitution - Missense      |
| 993  | A993T       | KD C-lobe | 1 | Lung                            | Substitution - Missense      |
| 996  | L996F       | KD C-lobe | 1 | Ovary                           | Substitution - Missense      |
| 1009 | C1009R      | KD C-lobe | 1 | Large intestine                 | Substitution - Missense      |

|      |                 |              |   |                          |                              |
|------|-----------------|--------------|---|--------------------------|------------------------------|
| 1012 | E1012E          | KD C-lobe    | 1 | Lung                     | Substitution - coding silent |
| 1014 | T1014_Q1016 del | KD C-lobe    | 1 | Ovary                    | Deletion - In frame          |
| 1024 | E1024*          | KD extension | 2 | Large intestine/<br>Lung | Substitution - Nonsense      |
| 1024 | E1024G          | KD extension | 1 | Large intestine          | Substitution - Missense      |
| 1024 | E1024E          | KD extension | 2 | Large intestine          | Substitution - coding silent |
| 1061 | P1061P          | KD extension | 1 | Urinary tract            | Substitution - coding silent |
| 1066 | S1066Y          | /            | 1 | Large intestine          | Substitution - Missense      |
| 1067 | R1067*          | /            | 1 | Endometrium              | Substitution - Nonsense      |
| 1088 | Q1088*          | /            | 1 | Kidney                   | Substitution - Nonsense      |
| 1094 | V1094L          | /            | 1 | Breast                   | Substitution - Missense      |
| 1100 | D1100N          | /            | 1 | Kidney                   | Substitution - Missense      |
| 1144 | P1144S          | /            | 1 | Breast                   | Substitution - Missense      |
| 1153 | L1153L          | /            | 1 | NS                       | Substitution - coding silent |
| 1171 | E1171K          | /            | 1 | Large intestine          | Substitution - Missense      |
| 1171 | E1171Q          | /            | 1 | NS                       | Substitution - Missense      |
| 1174 | A1174G          | /            | 2 | Ovary                    | Substitution - Missense      |
| 1179 | L1179F          | /            | 1 | NS                       | Substitution - Missense      |
| 1187 | V1187A          | /            | 1 | Large intestine          | Substitution - Missense      |
| 1198 | E1198*          | /            | 1 | NS                       | Substitution - Nonsense      |
| 1210 | L1210fs*23      | /            | 1 | Endometrium              | Deletion - Frameshift        |
| 1271 | G1271fs*23      | PRM2         | 1 | Large intestine          | Deletion - Frameshift        |
| 1293 | L1293F          | /            | 1 | Lung                     | Substitution - Missense      |
| 1299 | A1299A          | /            | 1 | Large intestine          | Substitution - coding silent |
| 1300 | A1300T          | /            | 1 | Large intestine          | Substitution - Missense      |
| 1325 | P1325S          | /            | 1 | Skin                     | Substitution - Missense      |
| 1329 | S1329F          | /            | 1 | Urinary tract            | Substitution - Missense      |
| 1331 | R1331*          | /            | 1 | Large intestine          | Substitution - Nonsense      |
| 1331 | R1331Q          | /            | 1 | Oesophagus               | Substitution - Missense      |
| 1367 | V1367I          | /            | 1 | Lung                     | Substitution - Missense      |
| 1367 | V1367L          | /            | 1 | Lung                     | Substitution - Missense      |
| 1370 | L1370L          | /            | 1 | Lung                     | Substitution - coding silent |
| 1403 | L1403L          | /            | 1 | Lung                     | Substitution - coding silent |
| 1422 | K1422N          | /            | 1 | Large intestine          | Substitution - Missense      |
| 1427 | S1427R          | /            | 1 | Kidney                   | Substitution - Missense      |
| 1446 | G1446E          | /            | 1 | Prostate                 | Substitution - Missense      |
| 1463 | T1463fs*>29     | /            | 1 | Large intestine          | Insertion - Frameshift       |
| 1483 | G1483R          | /            | 1 | Endometrium              | Substitution - Missense      |
|      | /               |              | 1 | Ovary                    | intronic                     |
|      | /               |              | 1 | Kidney                   | intronic                     |
|      | /               |              | 1 | Breast                   | intronic                     |

Information on *CDK12* mutations was obtained from the COSMIC database on April 20, 2014. Mutations within the RS (light green), PRM1/2 (light blue), KD N-terminal lobe (light magenta), KD C-terminal lobe (darker magenta), and KD C-terminal extension (dark magenta) regions are highlighted.

**Supplementary Table S3.** List of genes of which mRNA expression was statistically analyzed using HGS-OvCa patient sample data sets from the TCGA study (1).

| Gene    | Gene related to HR | Significant down-regulation with at least one probe ( $p < 0.05$ ) | Identified in (2). |
|---------|--------------------|--------------------------------------------------------------------|--------------------|
| ATM     | yes                | yes                                                                | no                 |
| ATR     | yes                | yes                                                                | yes                |
| CHEK1   | yes                | yes                                                                | no                 |
| MDC1    | yes                | yes                                                                | yes                |
| FANCI   | yes                | yes                                                                | yes                |
| RAD51D  | yes                | yes                                                                | no                 |
| CHEK2   | yes                | no                                                                 | no                 |
| BRCA1   | yes                | no                                                                 | yes                |
| BRCA2   | yes                | no                                                                 | no                 |
| BRCC3   | yes                | no                                                                 | yes                |
| PALB2   | yes                | no                                                                 | no                 |
| ATAD5   | yes                | no                                                                 | no                 |
| FANCA   | yes                | no                                                                 | no                 |
| FANCC   | yes                | no                                                                 | no                 |
| FANCE   | yes                | no ( $p=0.14$ )                                                    | no                 |
| MRE11A  | yes                | no                                                                 | no                 |
| NBN     | yes                | no                                                                 | no                 |
| RAD50   | yes                | no                                                                 | no                 |
| DSS1    | yes                | no                                                                 | no                 |
| RAD51   | yes                | no                                                                 | no                 |
| RAD51B  | yes                | no                                                                 | no                 |
| RAD51C  | yes                | no                                                                 | no                 |
| RAD52   | yes                | no                                                                 | no                 |
| RAD54L  | yes                | no                                                                 | no                 |
| XRCC2   | yes                | no                                                                 | no                 |
| XRCC3   | yes                | no                                                                 | no                 |
| DMC1    | yes                | no                                                                 | no                 |
| FEN1    | yes                | no                                                                 | no                 |
| RBBP8   | yes                | no                                                                 | no                 |
| RNF8    | yes                | no                                                                 | no                 |
| RPA1    | yes                | no                                                                 | no                 |
| SHFM1   | yes                | no                                                                 | no                 |
| TP53BP1 | yes                | no                                                                 | no                 |
| USP1    | yes                | no                                                                 | no                 |
| CTIP    | yes                | no                                                                 | no                 |
| FANCD2  | yes                | probes not available                                               | yes                |
| MMS22L  | yes                | probes not available                                               | yes                |
| RNF168  | yes                | probes not available                                               | no                 |
| NEK9    | no                 | yes                                                                | yes                |
| ORC3L   | no                 | yes                                                                | yes                |
| TERF2   | no                 | yes                                                                | yes                |
| ERCC1   | no                 | no ( $p=0.07$ )                                                    | yes                |
| ERCC4   | no                 | no ( $p=0.11$ )                                                    | no                 |
| CDK10   | no                 | no                                                                 | yes                |
| DDB2    | no                 | no                                                                 | yes                |
| ITPA    | no                 | no ( $p=0.07$ )                                                    | yes                |
| KNTC1   | no                 | no                                                                 | yes                |
| MUS81   | no                 | no                                                                 | yes                |
| NCAPD2  | no                 | no                                                                 | yes                |
| OGG1    | no                 | no                                                                 | yes                |



|                |    |    |     |
|----------------|----|----|-----|
| <i>PNKP</i>    | no | no | yes |
| <i>RCF4</i>    | no | no | yes |
| <i>RCF5</i>    | no | no | no  |
| <i>RUVBL1</i>  | no | no | yes |
| <i>SMARCC2</i> | no | no | yes |
| <i>SMUG1</i>   | no | no | yes |
| <i>TAP1</i>    | no | no | no  |
| <i>TAP2</i>    | no | no | yes |
| <i>TDP1</i>    | no | no | yes |
| <i>TSG101</i>  | no | no | yes |
| <i>ZWINT</i>   | no | no | yes |

Genes related to HR are depicted in light magenta, while other DDR genes are depicted in light blue. Green color depicts the significantly down-regulated genes

## SUPPLEMENTARY MATERIALS AND METHODS

**Supplementary Table S4.** Plasmids used in this study.

| Gene                             | Vector               | Restriction sites | Figure    |
|----------------------------------|----------------------|-------------------|-----------|
| /                                | pcDNA5/FRT/TO        | /                 | /         |
| 3XFLAG                           | pcDNA5/FRT/TO/3XFLAG | /                 | 1, 6, S2C |
| CDK12                            | pcDNA5/FRT/TO/3XFLAG | BamHI-NotI        | 1, 6, S2C |
| CDK12 W719*                      | pcDNA5/FRT/TO/3XFLAG | BamHI-NotI        | 1, 6, S2C |
| CDK12 E928fs <sup>27*</sup>      | pcDNA5/FRT/TO/3XFLAG | BamHI-NotI        | 1, 6, S2C |
| CDK12 R882L                      | pcDNA5/FRT/TO/3XFLAG | BamHI-NotI        | 1, 6, S2C |
| CDK12 Y901C                      | pcDNA5/FRT/TO/3XFLAG | BamHI-NotI        | 1, 6, S2C |
| CDK12 K975E                      | pcDNA5/FRT/TO/3XFLAG | BamHI-NotI        | 1, 6, S2C |
| CDK12 L996F                      | pcDNA5/FRT/TO/3XFLAG | BamHI-NotI        | 1, 6, S2C |
| 3XFLAG                           | pcDNA3.1/3XFLAG      | NheI-AfIII        | S2B, S4   |
| CDK12                            | pcDNA3.1/3XFLAG      | NheI-AfIII        | S2B, S4   |
| CDK12 S325N                      | pcDNA3.1/3XFLAG      | NheI-AfIII        | S2B       |
| CDK12 S352F                      | pcDNA3.1/3XFLAG      | NheI-AfIII        | S2B       |
| CDK12 G929R                      | pcDNA3.1/3XFLAG      | NheI-AfIII        | S2B       |
| CDK12 1024*                      | pcDNA3.1/3XFLAG      | NheI-AfIII        | S2B       |
| CDK12 D877N                      | pcDNA3.1/3XFLAG      | NheI-AfIII        | S4        |
| REV                              | pREV                 | -                 | 3         |
| REV, CDK12                       | pREV                 | NheI-Sall         | 3, S4     |
| REV, CDK12 W719*                 | pREV                 | NheI-Sall         | 3         |
| REV, CDK12 E928fs <sup>27*</sup> | pREV                 | NheI-Sall         | 3         |
| REV, CDK12 R882L                 | pREV                 | NheI-Sall         | 3         |
| REV, CDK12 Y901C                 | pREV                 | NheI-Sall         | 3         |
| REV, CDK12 K975E                 | pREV                 | NheI-Sall         | 3         |
| REV, CDK12 L996F                 | pREV                 | NheI-Sall         | 3         |
| REV, CDK12 S325N                 | pREV                 | NheI-Sall         | S4        |
| REV, CDK12 S352F                 | pREV                 | NheI-Sall         | S4        |
| REV, CDK12 G909R                 | pREV                 | NheI-Sall         | S4        |
| REV, CDK12 1024*                 | pREV                 | NheI-Sall         | S4        |
| REV, CDK12 D877N                 | pREV                 | NheI-Sall         | 3, S4     |
| CAT                              | pSLIIB-CAT           | /                 | 3, S4     |
| I-SCEI                           | pC $\beta$ ASce      | XhoI              | 6         |

**Supplementary Table S5.** DNA oligonucleotides used in RT-qPCR assay.

| <b>Gene</b>   | <b>Primer Sequence (5'–3')</b>                                          | <b>Figure</b> |
|---------------|-------------------------------------------------------------------------|---------------|
| <i>ATM</i>    | GCTCAGGAAGGAATGAGAGAAA<br>CCACAGCTATCAACGTCAGTAA                        | 4, S7, S8     |
| <i>ATR</i>    | TGGCTCACCAGAGAGAAATG<br>GCAGCAAGATCAGGTAGTAGAA                          | 4, S7, S8     |
| <i>BRCA1</i>  | TGAGGCATCAGTCTGAAAGCC<br>AAAATGTCACTCTGAGAGGAT                          | 4, S7, S8     |
| <i>CDK12</i>  | CCTGGAGATGATGACATGGATAG<br>GAGGAAGGTCTGTGAGTAAGTG                       | 4, S7, S8     |
| <i>CDK13</i>  | GCAGTGTGGCCTGATGTAATC<br>CTGCTTCTGTCTTCTTCGC                            | S8            |
| <i>CHEK1</i>  | GGTTGACTTCCGGCTTTCTAA<br>TCTTCTGGCTGCTCACAATATC                         | 4, S7, S8     |
| <i>CCNK</i>   | TCACAGCCGTCTCAAAGCTC<br>CTTCTTTGGGAGAAACAA                              | S8            |
| <i>FANCD2</i> | CATCTCTAATGACCAGCTCC<br>AGTTCAGCCATCATCACACG                            | 4, S7, S8     |
| <i>FANCI</i>  | ACAAGTGAGCCAAGAAACC<br>CAAGGGCTGTAAGTGTGGT                              | 4, S7, S8     |
| <i>HPRT</i>   | CCAGACAAGTTTGTGTAGGATATGCCCTTGAC<br>ACTCCAGATGTTTCCAAACTCAACTTGA ACTCTC | 4, S7, S8     |
| <i>MDC1</i>   | ACAGGAAGGGAGAGAGAACA<br>AAAGCACTGGGTAGCTTGTAG                           | 4, S7, S8     |
| <i>RAD51D</i> | CAGGTGGTGCATGCATTTG<br>CACCTTCACAGTTCTGAAGA                             | 4, S7, S8     |

**Supplementary Table S6.** DNA oligonucleotides used in ChIP-qPCR assay.

| <b>Primer</b> | <b>Primer Sequence (5'-3')</b>                   | <b>Figure</b> |
|---------------|--------------------------------------------------|---------------|
| ATM-TSS       | CCTGACTTTCCTTCCGAATC<br>GAGGTTCTGGGCAGTTTAAG     | 5             |
| ATM-ORF       | AGGACACGAAGGGAGATT<br>CCTTCCTGAGCTTTCAAGTAT      | 5             |
| ATM-pA        | CCAAGGACAAATGAGGAGTAG<br>CCAGCAGTGTATTGGGATAG    | 5             |
| ATR-TSS       | GTTGGCGTGGTTGACTA<br>AATCAGCGGAGGAGGAT           | S9            |
| ATR-ORF       | GTAGCCTGTGATGCTGTTT<br>AGGTGACAACGAAGGATTTAG     | S9            |
| ATR-pA        | TGTGCTTCAAAGGGTACTTC<br>CTACATCACACAGAGCTATTAC   | S9            |
| CHEK1-TSS     | GGAGTTCCTCCCATTTCCTC<br>GAAGCAGAGTGCTTTGTAAAC    | 5             |
| CHEK1-ORF     | GTAGGGAGCTGGAATCATTATC<br>TCAAGGGAGATGGGAGAAA    | 5             |
| CHEK1-pA      | GGCAATAGGTAGCATGGATA<br>GAGGGTCAGAGATGAAGAAG     | 5             |
| FANCD2-TSS    | CCGAAGCGGCGATAAATAA<br>GCTCTTCACCACCTATACTTAC    | S9            |
| FANCD2-ORF    | CCTAGTGTGTAGTAGTGGAATG<br>TTGAGGGCAGAGGATCTAATA  | S9            |
| FANCD2-pA     | GTATTGCCTGTAAACTCAACC<br>GTGCTCTCCTGGGAATTT      | S9            |
| MDC1-TSS      | GACAGCCTTTAAGACAGAGAG<br>ATCTTTCTTCCTGGGAATACG   | 5             |
| MDC1-ORF      | GCAAGTCCTGAAAGAGATAGG<br>GCTACTGGTCTCTCTACTTCT   | 5             |
| MDC1-pA       | TCCCTCATTGCTCCATTC<br>GAGTTCTCAGGTGGATGAC        | 5             |
| RAD51D-TSS    | AGCCACAGGATCAAGACA<br>GGCCCTCTAGGAATGGAG         | 5             |
| RAD51D-ORF    | TGGCCTGAGTTTCTCTCT<br>TGGCATGCACCTGTAATC         | 5             |
| RAD51D-pA     | CCAGGAAGATGCCAGTAATC<br>CCAAGTGGGTAGCTTCTTTAG    | 5             |
| FANCI-IR      | GATCTAGGATGACAGCAGAATAG<br>GTGGACCTCTCTGGTCTATAA | S9            |
| RAD51-IR      | GAAGCTCCAAGAGGGACAATAG<br>GCGTAGATGCTCCCATCTTATC | S9            |



## SUPPLEMENTARY REFERENCES

1. Cancer Genome Atlas Research N (2011) Integrated genomic analyses of ovarian carcinoma. *Nature* 474(7353):609-615.
2. Blazek D, *et al.* (2011) The Cyclin K/Cdk12 complex maintains genomic stability via regulation of expression of DNA damage response genes. *Genes & development* 25(20):2158-2172.
